# Supplementary material for: Ligand effects in photoluminescence of copper nanoclusters
Source: Royal Society of Chemistry journal article supplement (doi:10.1039/d4dt02060j), 2024-01-01
Supplement: d4dt02060j1.pdf [file d4dt02060j1.pdf]

## Electronic Supplementary Material

### Ligand effects in photoluminescence of copper nanoclusters

Peiling Du<sup>a†</sup>, Sachurilatu<sup>a†</sup>, Wenya Jiang<sup>b†</sup>, Jianyu Wei,<sup>\*b</sup> Simin Li<sup>\*a</sup>, and Hui Shen<sup>\*a</sup>

- a. College of Energy Materials and Chemistry, Inner Mongolia University, Hohhot 010021, China.
- b. School of Materials and New Energy, Ningxia University, Yinchuan, Ningxia 750021, China.

† These authors contribute equally to this work.

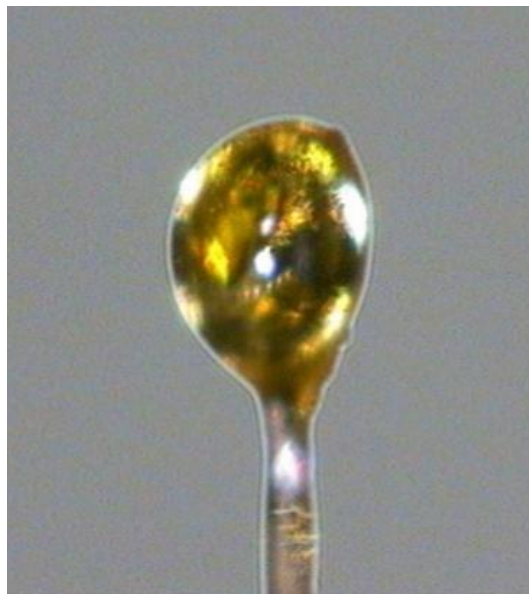

**Figure S1.** Digital photograph of single crystal of the **Cu<sub>9</sub>-1** cluster.

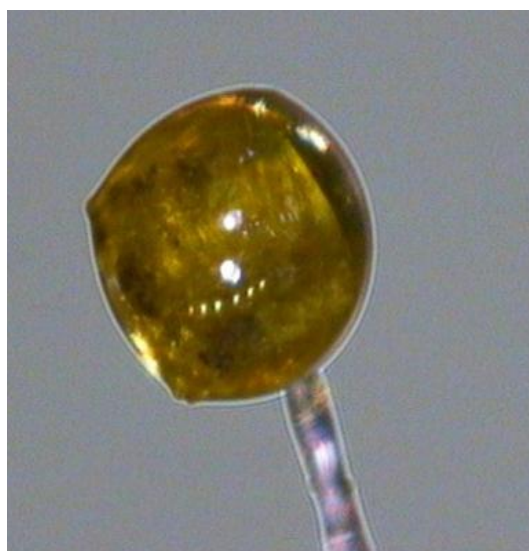

**Figure S2.** Digital photograph of single crystal of the **Cu<sub>9</sub>-2** cluster.

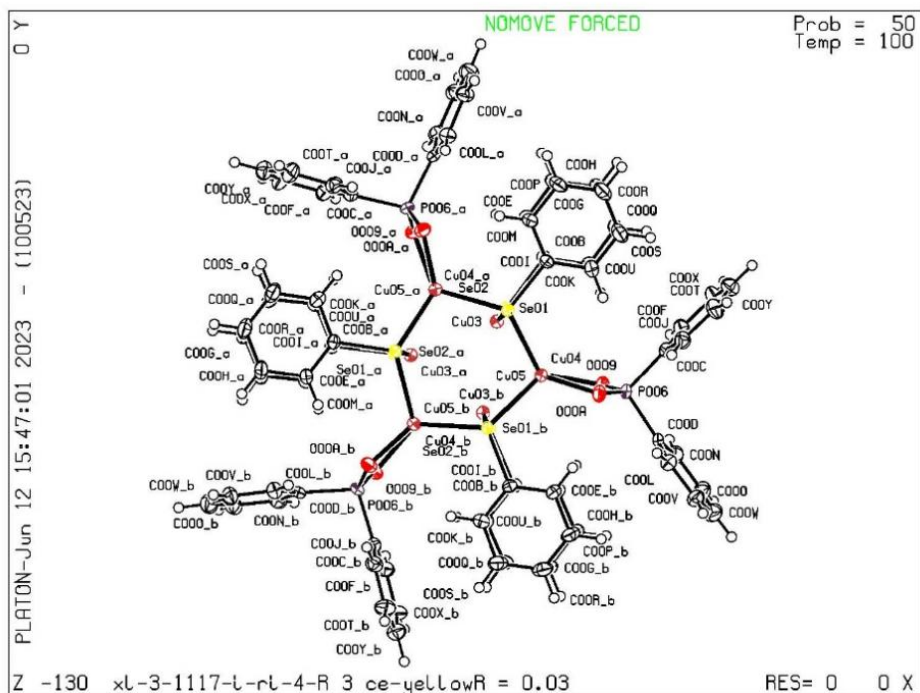

Figure S3. The thermal ellipsoids of the ORTEP diagram of the **Cu<sub>9</sub>-1** cluster.

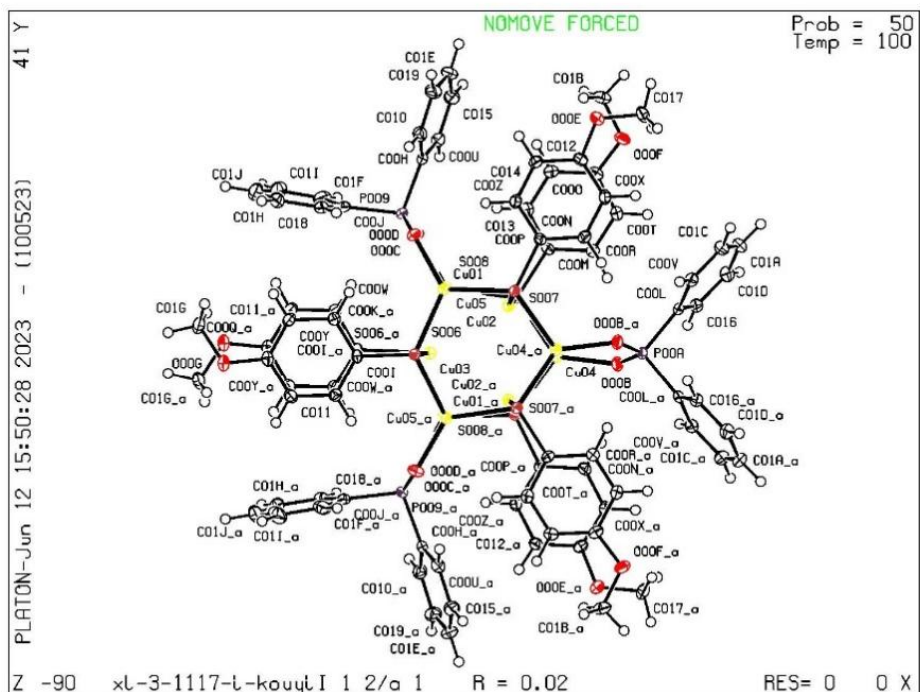

Figure S4. The thermal ellipsoids of the ORTEP diagram of the **Cu<sub>9</sub>-2** cluster.

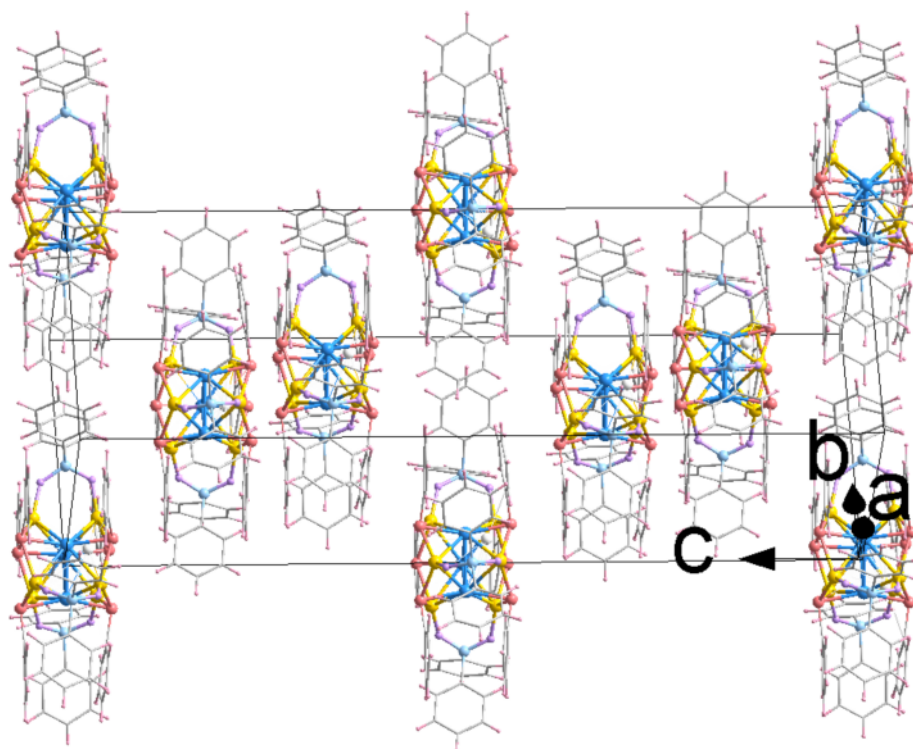

**Figure S5.** The packing structure of **Cu<sub>9</sub>-1** in the unit cell. Color codes for atoms: blue, Cu (centre); yellow, Cu (side); brick red, Se; purple, O; light-blue, P; grey, C; pink, H.

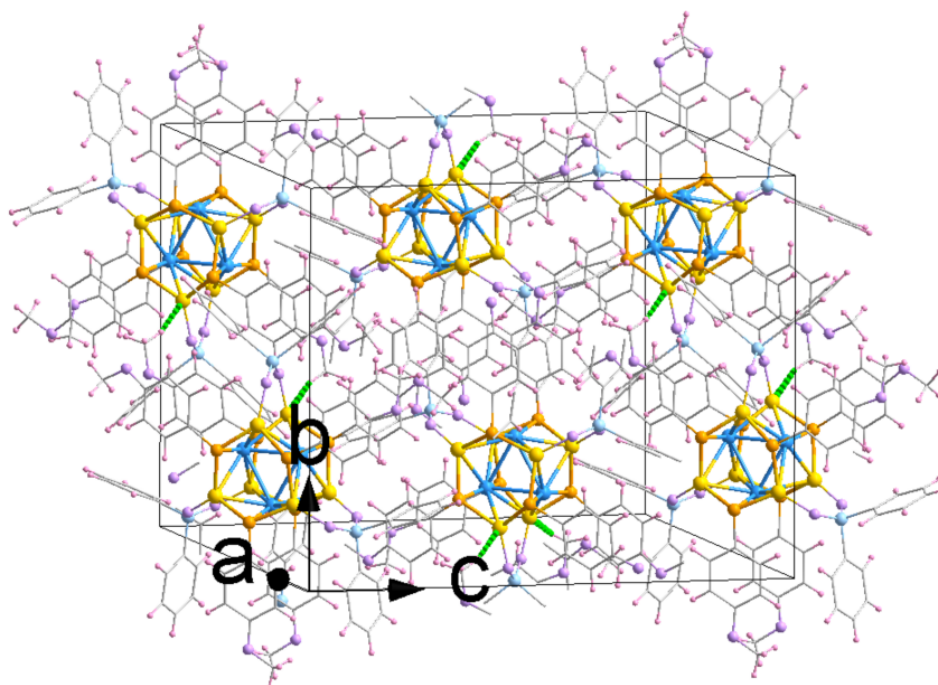

**Figure S6.** The packing structure of **Cu<sub>9</sub>-2** in the unit cell. Color codes for atoms: blue, Cu (centre); yellow, Cu (side); orange, S; purple, O; light-blue, P; grey, C; pink, H. Hydrogen bonding between Cu and H: green.

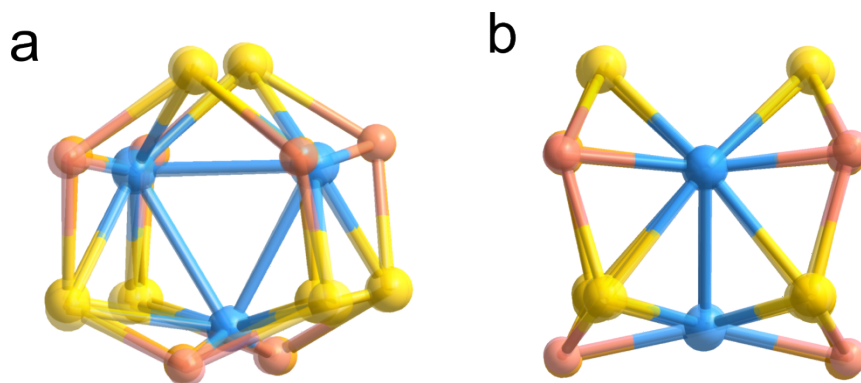

**Figure S7.** The overlay of the core of Cu<sub>9</sub>-1 and Cu<sub>9</sub>-2 clusters in front (a) and side (b) views.

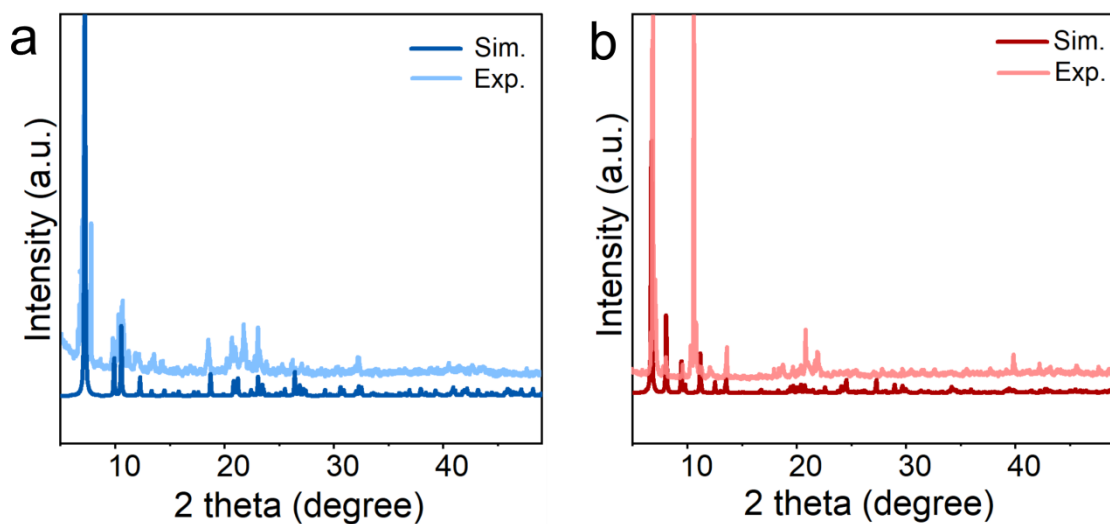

**Figure S8.** Powder X-ray diffraction (PXRD) patterns for Cu<sub>9</sub>-1 (a) and Cu<sub>9</sub>-2 (b) measured at room temperature. Simulated patterns were compared with the experimental ones to confirm purity of the sample.

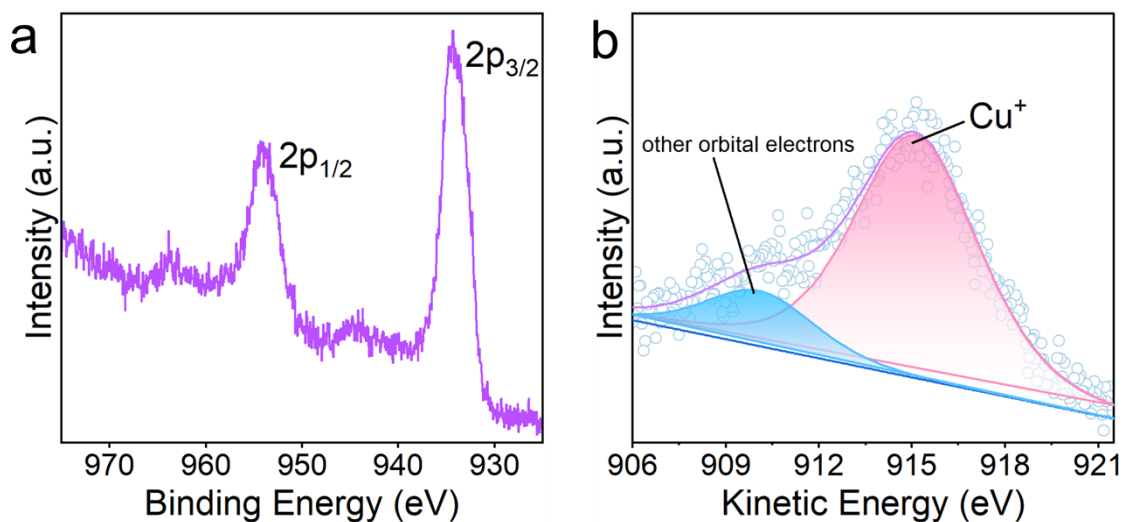

**Figure S9.** XPS spectra of **Cu<sub>9</sub>-1**. (a) Cu 2p XPS spectrum. (b) Cu LMM Auger spectrum.

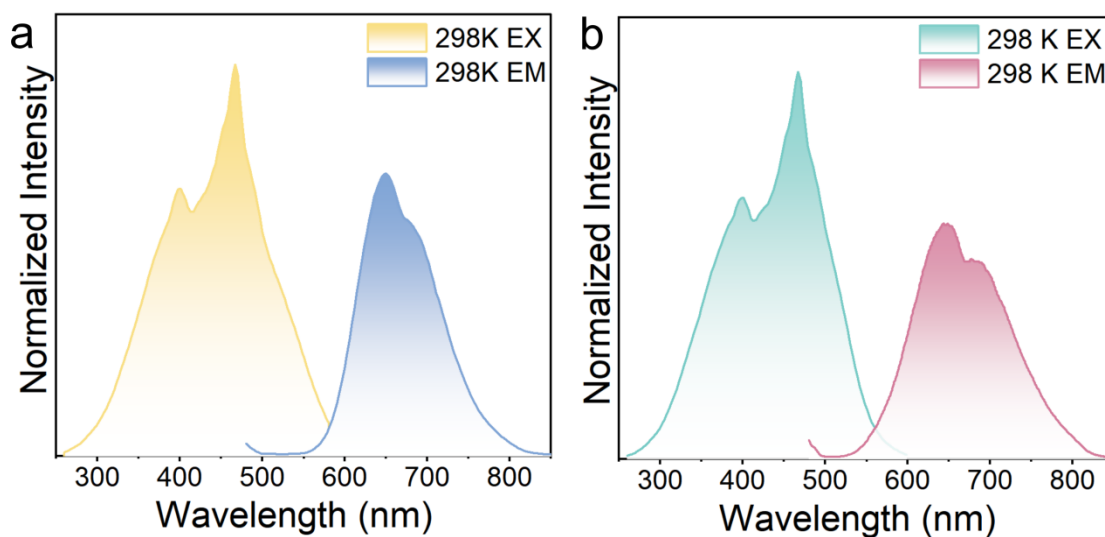

**Figure S10.** (a) Excitation (yellow,  $\lambda_{em} = 466$  nm) and emission (blue) spectra of **Cu<sub>9</sub>-1** at 298 K. (b) Excitation (green,  $\lambda_{em} = 467$  nm) and emission (red) spectra of **Cu<sub>9</sub>-2** at 298 K.

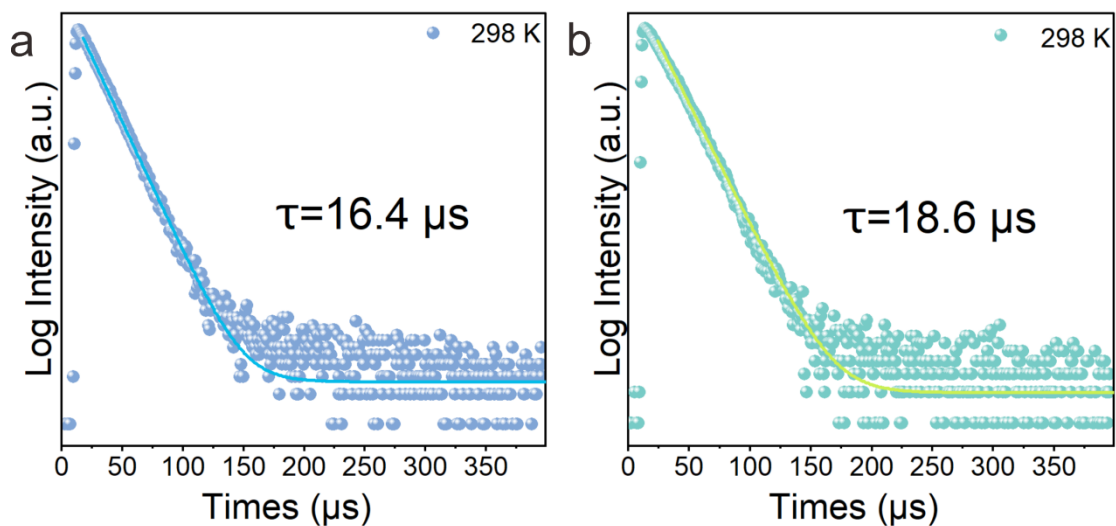

**Figure S11.** Plots of emission decay lifetime of **Cu<sub>9</sub>-1** (a) and **Cu<sub>9</sub>-2** (b) at 298 K.

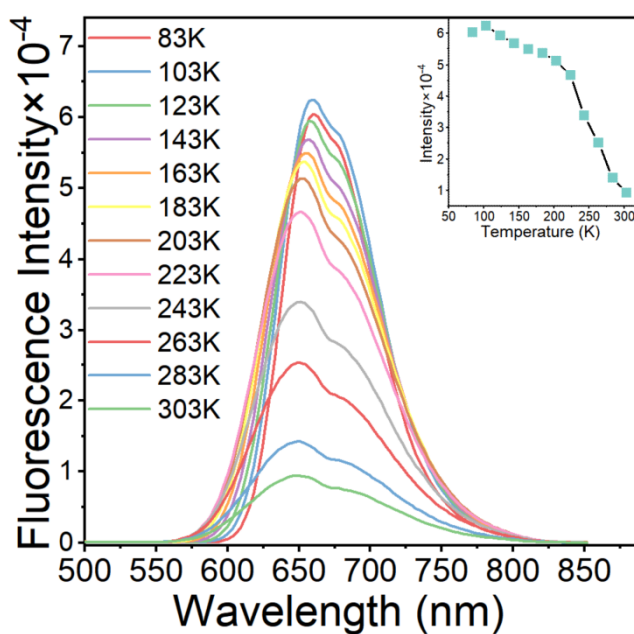

**Figure S12.** Temperature dependence in the range of 83 ~ 303 K of **Cu<sub>9</sub>-1**. Insert: maximum photoluminescence intensity at each temperature.

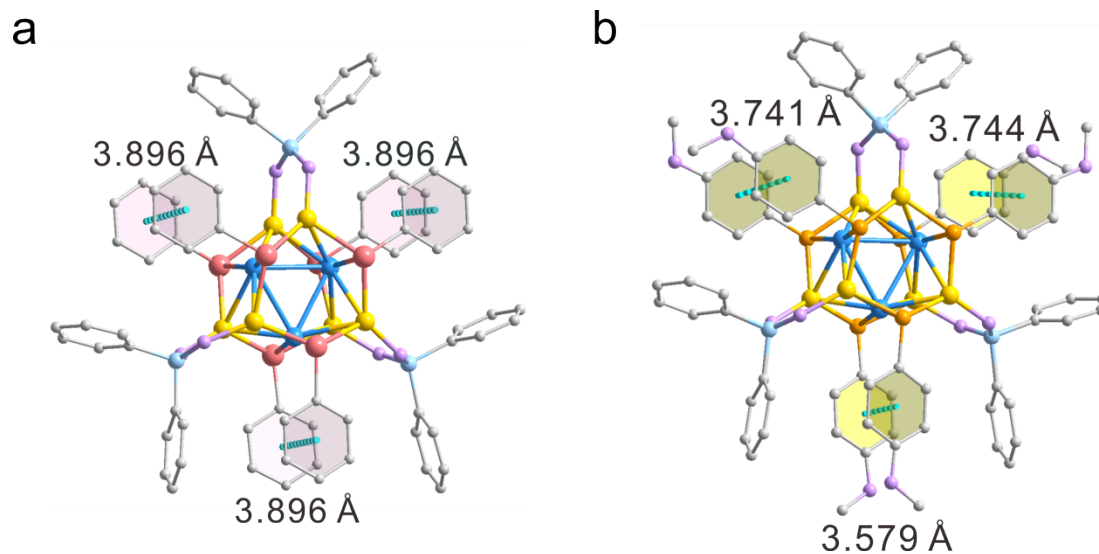

**Figure S13.** Distances between adjacent benzene rings in **Cu<sub>9</sub>-1** (a) and **Cu<sub>9</sub>-2** (b). Colour legend: blue, Cu (centre); yellow, Cu (side); brick red, Se; orange, S; Purple, O; light-blue, P; grey, C. All hydrogen atoms are omitted for clarity.



**Table S1.** Crystallographic data of **Cu<sub>9</sub>-1**.

| identification code                                                            | <b>Cu<sub>9</sub>-1</b>                                                                       |
|--------------------------------------------------------------------------------|-----------------------------------------------------------------------------------------------|
| formula                                                                        | C <sub>72</sub> H <sub>60</sub> Cu <sub>9</sub> O <sub>6</sub> P <sub>3</sub> Se <sub>6</sub> |
| formula weight                                                                 | 2159.73                                                                                       |
| Temperature/K                                                                  | 100.00(10)                                                                                    |
| crystal system                                                                 | trigonal                                                                                      |
| space group                                                                    | <i>R3c</i>                                                                                    |
| <i>a</i> (Å)                                                                   | 17.8552(3)                                                                                    |
| <i>b</i> (Å)                                                                   | 17.8552(3)                                                                                    |
| <i>c</i> (Å)                                                                   | 39.8409(10)                                                                                   |
| $\alpha$ (°)                                                                   | 90                                                                                            |
| $\beta$ (°)                                                                    | 90                                                                                            |
| $\gamma$ (°)                                                                   | 120                                                                                           |
| <i>V</i> (Å <sup>3</sup> )                                                     | 10999.9(5)                                                                                    |
| <i>Z</i>                                                                       | 6                                                                                             |
| $\rho_{calc}/cm^3$                                                             | 1.956                                                                                         |
| Radiation                                                                      | Cu K $\alpha$ ( $\lambda$ = 1.54184 Å)                                                        |
| Theta (°) range                                                                | 7.238 to 129.628                                                                              |
| Index ranges                                                                   | -20 ≤ <i>h</i> ≤ 20, -20 ≤ <i>k</i> ≤ 20, -42 ≤ <i>l</i> ≤ 46                                 |
| Refls. Total                                                                   | 23097                                                                                         |
| restraints                                                                     | 323                                                                                           |
| parameters                                                                     | 289                                                                                           |
| <i>R</i> <sub>1</sub> / <i>wR</i> <sub>2</sub><br>[ <i>I</i> > 2σ( <i>I</i> )] | 0.0348/ 0.0778                                                                                |
| <i>R</i> <sub>1</sub> / <i>wR</i> <sub>2</sub><br>(all data)                   | 0.0441/0.0828                                                                                 |
| completeness                                                                   | 0.997                                                                                         |
| Goof                                                                           | 1.042                                                                                         |

**Table S2.** Crystallographic data of **Cu<sub>9</sub>-2**.

| identification code                                                                     | <b>Cu<sub>9</sub>-2</b>                                                                       |
|-----------------------------------------------------------------------------------------|-----------------------------------------------------------------------------------------------|
| formula                                                                                 | C <sub>78</sub> H <sub>72</sub> Cu <sub>9</sub> O <sub>12</sub> P <sub>3</sub> S <sub>6</sub> |
| formula weight                                                                          | 2058.48                                                                                       |
| Temperature/K                                                                           | 100.00(10)                                                                                    |
| crystal system                                                                          | monoclinic                                                                                    |
| space group                                                                             | <i>I2/a</i>                                                                                   |
| <i>a</i> (Å)                                                                            | 19.04350(10)                                                                                  |
| <i>b</i> (Å)                                                                            | 18.48760(10)                                                                                  |
| <i>c</i> (Å)                                                                            | 22.3002(2)                                                                                    |
| $\alpha$ (°)                                                                            | 90                                                                                            |
| $\beta$ (°)                                                                             | 100.8800(10)                                                                                  |
| $\gamma$ (°)                                                                            | 90                                                                                            |
| <i>V</i> (Å <sup>3</sup> )                                                              | 7710.07(9)                                                                                    |
| <i>Z</i>                                                                                | 4                                                                                             |
| <i>D<sub>c</sub></i> / (g·cm <sup>-3</sup> )                                            | 1.773                                                                                         |
| Radiation                                                                               | Cu K $\alpha$ ( $\lambda$ = 1.54184 Å)                                                        |
| Theta (°) range                                                                         | 6.256 to 146.232                                                                              |
| Index ranges                                                                            | -21 $\leq$ h $\leq$ 22, -22 $\leq$ k $\leq$ 21, -27 $\leq$ l $\leq$ 25                        |
| Refls. Total                                                                            | 24413                                                                                         |
| restraints                                                                              | 72                                                                                            |
| parameters                                                                              | 492                                                                                           |
| <i>R</i> <sub>1</sub> / <i>wR</i> <sub>2</sub><br>[ <i>I</i> > 2 $\sigma$ ( <i>I</i> )] | 0.0218/0.0572                                                                                 |
| <i>R</i> <sub>1</sub> / <i>wR</i> <sub>2</sub><br>(all data)                            | 0.0232/0.0581                                                                                 |
| completeness                                                                            | 0.993                                                                                         |
| Goof                                                                                    | 1.046                                                                                         |

**Table S3.** Selected bond lengths (Å) for cluster **Cu<sub>9</sub>-1**.

| Parameter  | value      | Parameter | value     |
|------------|------------|-----------|-----------|
| Se01-Cu03  | 2.3258(17) | C00C-C00F | 1.374(14) |
| Se01-Cu041 | 2.3944(15) | C00C-C00J | 1.398(14) |
| Se01-Cu04  | 2.3835(15) | C00D-C00L | 1.397(14) |
| Se01-C00B  | 1.948(8)   | C00D-C00N | 1.410(14) |
| Se02-Cu03  | 2.3282(18) | C00E-C00H | 1.413(14) |
| Se02-Cu05  | 2.3628(15) | C00F-C00X | 1.391(15) |
| Se02-Cu051 | 2.4278(15) | C00G-C00H | 1.384(15) |
| Se02-C00I  | 1.931(8)   | C00G-C00Q | 1.378(14) |
| Cu03-Cu032 | 2.869(2)   | C00I-C00M | 1.369(13) |
| Cu03-Cu031 | 2.869(2)   | C00I-C00U | 1.394(14) |
| Cu03-Cu041 | 2.7169(18) | C00J-C00T | 1.395(15) |
| Cu03-Cu04  | 2.6675(18) | C00K-C00Q | 1.406(14) |
| Cu03-Cu051 | 2.6732(18) | C00L-C00V | 1.384(15) |
| Cu03-Cu05  | 2.6822(18) | C00M-C00P | 1.410(14) |
| Cu04-O009  | 1.943(6)   | C00N-C00O | 1.383(16) |
| Cu05-O00A  | 1.921(7)   | C00O-C00W | 1.391(17) |
| P006-O009  | 1.510(7)   | C00P-C00R | 1.376(15) |
| P006-O00A  | 1.510(7)   | C00R-C00S | 1.397(16) |
| P006-C00C  | 1.802(10)  | C00S-C00U | 1.395(14) |
| P006-C00D  | 1.800(9)   | C00T-C00Y | 1.387(16) |
| C00B-C00E  | 1.359(13)  | C00V-C00W | 1.370(16) |
| C00B-C00K  | 1.389(13)  | C00X-C00Y | 1.388(15) |

**Table S4.** Selected bond lengths (Å) for cluster **Cu<sub>9</sub>-2**.

| Parameter  | value      | Parameter | value    |
|------------|------------|-----------|----------|
| Cu01-Cu02  | 2.6717(4)  | O00G-C01G | 1.430(2) |
| Cu01-Cu03  | 2.6373(3)  | C00H-C00U | 1.391(3) |
| Cu01-S006  | 2.2616(5)  | C00H-C010 | 1.396(3) |
| Cu01-S008  | 2.2619(5)  | C00I-C00K | 1.396(2) |
| Cu01-O00C  | 1.9515(12) | C00I-C00W | 1.381(2) |
| Cu02-Cu021 | 2.9390(5)  | C00J-C018 | 1.395(3) |
| Cu02-Cu03  | 2.8637(4)  | C00J-C01F | 1.394(3) |
| Cu02-Cu04  | 2.7261(4)  | C00K-C011 | 1.383(3) |
| Cu02-Cu041 | 2.5841(3)  | C00L-C00V | 1.397(3) |
| Cu02-Cu05  | 2.6369(4)  | C00L-C016 | 1.397(3) |
| Cu02-S007  | 2.2015(5)  | C00M-C00R | 1.393(2) |
| Cu02-S008  | 2.2144(5)  | C00M-C013 | 1.379(3) |
| Cu03-Cu051 | 2.6778(3)  | C00N-C00P | 1.385(2) |
| Cu03-Cu05  | 2.6778(3)  | C00N-C00X | 1.390(3) |
| Cu03-S006  | 2.2053(4)  | C00O-C00T | 1.397(3) |
| Cu03-S0061 | 2.2052(4)  | C00O-C014 | 1.389(3) |
| Cu04-S007  | 2.2507(5)  | C00P-C00Z | 1.396(2) |
| Cu04-S0081 | 2.2974(5)  | C00Q-C00Y | 1.388(3) |
| Cu04-O00B  | 1.9497(12) | C00Q-C011 | 1.394(3) |
| Cu05-S0061 | 2.2704(5)  | C00R-C00T | 1.383(3) |
| Cu05-S007  | 2.2746(5)  | C00S-C00X | 1.392(3) |
| Cu05-O00D  | 1.9393(12) | C00S-C012 | 1.396(3) |
| S006-C00I  | 1.7993(18) | C00U-C015 | 1.390(3) |
| S007-C00M  | 1.7982(17) | C00V-C01C | 1.394(3) |
| S008-C00P  | 1.7988(17) | C00W-C00Y | 1.394(3) |
| P009-O00C  | 1.5143(13) | C00Z-C012 | 1.380(3) |
| P009-O00D  | 1.5079(13) | C010-C019 | 1.386(3) |
| P009-C00H  | 1.8089(18) | C013-C014 | 1.390(3) |
| P009-C00J  | 1.8107(19) | C015-C01E | 1.381(3) |
| P00A-O00B1 | 1.5124(13) | C016-C01D | 1.389(3) |
| P00A-O00B  | 1.5125(13) | C018-C01H | 1.390(3) |
| P00A-C00L  | 1.8094(18) | C019-C01E | 1.389(3) |
| P00A-C00L1 | 1.8094(18) | C01A-C01C | 1.384(3) |
| O00E-C00S  | 1.368(2)   | C01A-C01D | 1.388(3) |
| O00E-C017  | 1.428(2)   | C01F-C01I | 1.404(3) |
| O00F-C00O  | 1.365(2)   | C01H-C01J | 1.372(4) |
| O00F-C01B  | 1.430(2)   | C01I-C01J | 1.382(4) |
| O00G-C00Q  | 1.370(2)   |           |          |
